# Supplementary material for: ACSL4 serves as a novel prognostic biomarker correlated with immune infiltration in Cholangiocarcinoma
Source: Springer Nature journal article supplement (doi:10.1186/s12885-023-10903-5), 2023-05-16

## **ACSL4 serves as a novel prognostic biomarker correlated with immune infiltration in Cholangiocarcinoma**

Shuochen Liu<sup>1,2,†</sup>, Shilong Fan<sup>1,2,†</sup>, Yirui Wang<sup>1,2,†</sup>, Ruixiang Chen<sup>1,2,†</sup>, Ziyi Wang<sup>1,2,3</sup>, Yaodong Zhang<sup>1,2</sup>, Wangjie Jiang<sup>1,2</sup>, Yananlan Chen<sup>1,2</sup>, Xiao Xu<sup>1,2</sup>, Yue Yu<sup>1,2,\*</sup>, Changxian Li<sup>1,2,\*</sup>, Xiangcheng Li<sup>1,2,\*</sup>.

1 Hepatobiliary Center, The First Affiliated Hospital of Nanjing Medical University, Nanjing, China.

2 Key Laboratory of Liver Transplantation, Chinese Academy of Medical Sciences, Nanjing, China.

3 Department of Liver Surgery and Transplantation, Liver Cancer Institute and Zhongshan Hospital, Fudan University, Shanghai, China.

\*Correspondence: Xiangcheng Li, [drxcli@njmu.edu.cn](mailto:drxcli@njmu.edu.cn) ; Changxian Li, [doclicx20@163.com](mailto:doclicx20@163.com); Yue Yu, [yuyue@njmu.edu.cn](mailto:yuyue@njmu.edu.cn).

† These authors contribute equally to this work.

## Supplement Figure

### Supplement Figure 1 The relationship between 4 ferroptosis-related genes and overall survival in CHOL.

(A) The PCA analysis of TCGA-CHOL and GSE107943 datasets before removing batch effects. (B) The PCA analysis of TCGA-CHOL and GSE107943 datasets after removing batch effects. (C-F) OS in high and low MUC1, SLC7A11, ACSL3, SLC38A1 group in meta cohort.

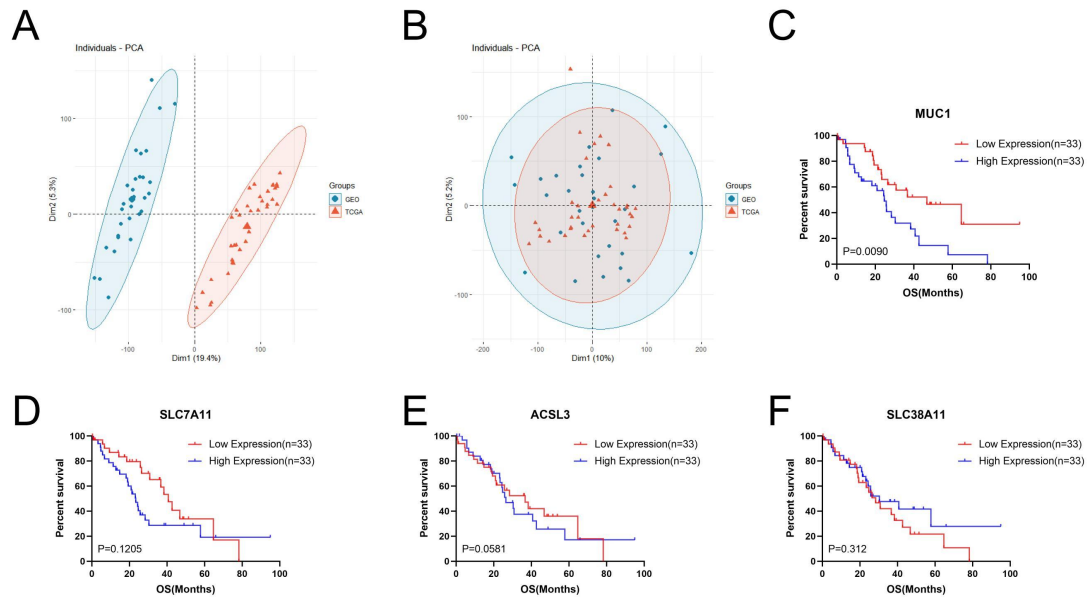

### Supplement Figure 2 Cellular identity in GSE138709

(A-I) The expression of canonical marker genes for ten distinct cell types is shown in tSNE plots. T cells (CD3D), malignancy (KRT19), cholangiocytes (FXD2), monocytes (CD14), hepatocytes (ASGR1), endothelial cells (FCN3), fibroblasts (ACTA2), and B cells (CD79A). (J) The expression of ACSL4 in different types of cells in CHOL compared with normal samples.

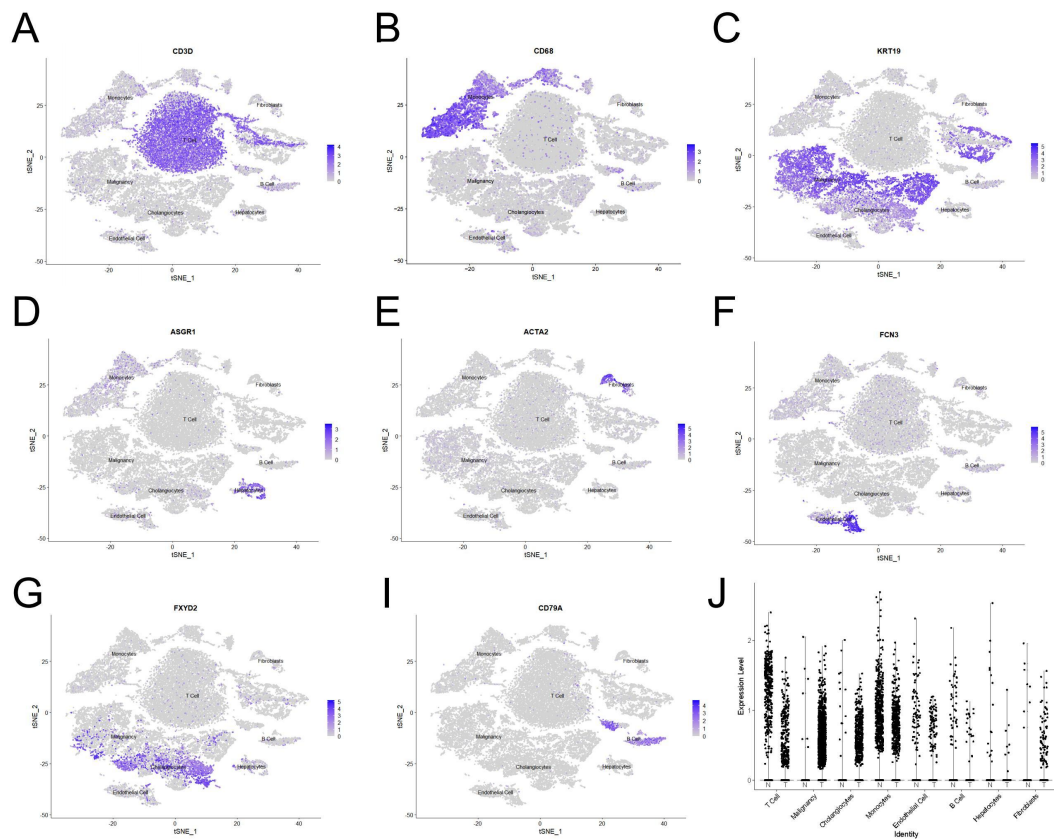

**Supplement Figure 3 ACSL4 acts as a crucial factor of ferroptosis in CHOL**  
**(A-B)** Knockdown of ACSL4 alleviated erastin-induced cell death in RBE and HuCCT1. **(C-F)** ROS and  $\text{Fe}^{2+}$  were assayed in RBE and HuCCT1 following treatment with **erastin (20  $\mu\text{M}$ )** for 24 h.

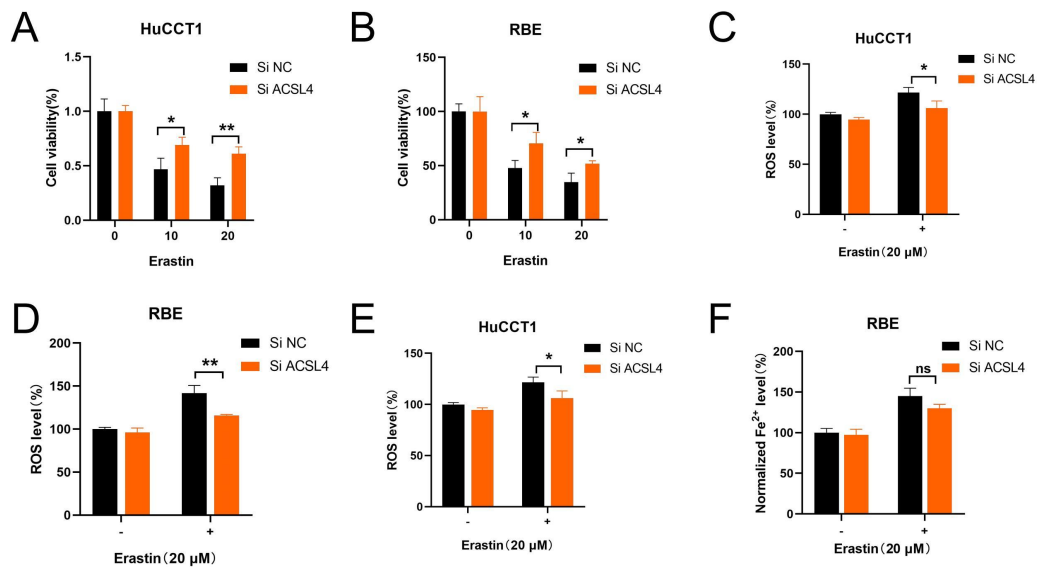

Figure 1E

ACSL4

T N T N T N T N T N T N

ACSL4 79kb

70kb

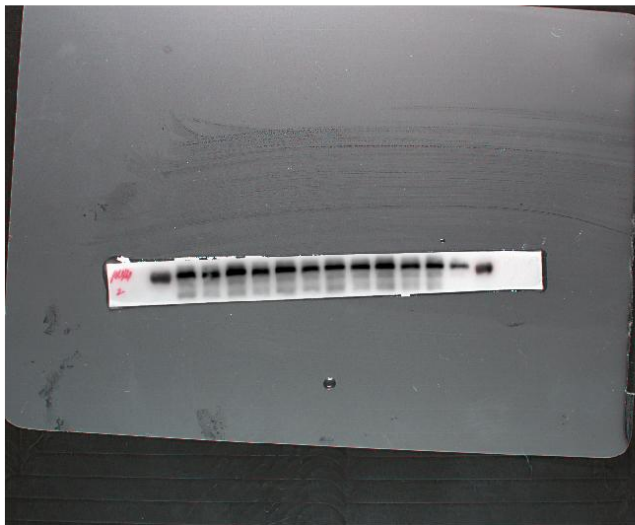

The other exposure image

T N T N T N T N T N T N

ACSL4 79kb

70kb

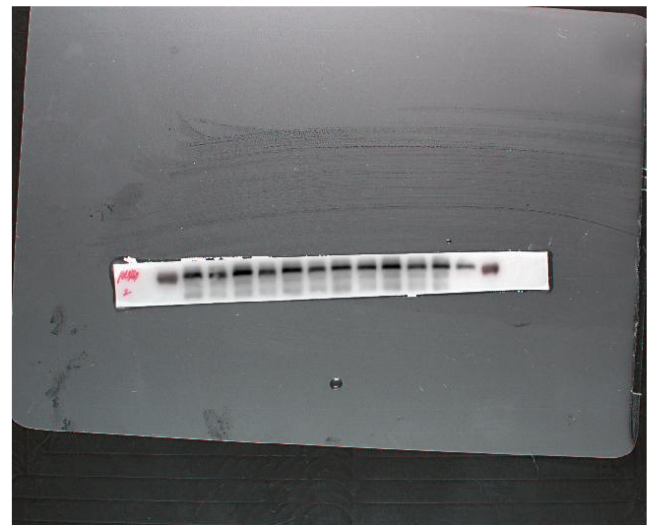

GAPDH

T N T N T N T N T N T N

GAPDH 36kb

40kb

35kb

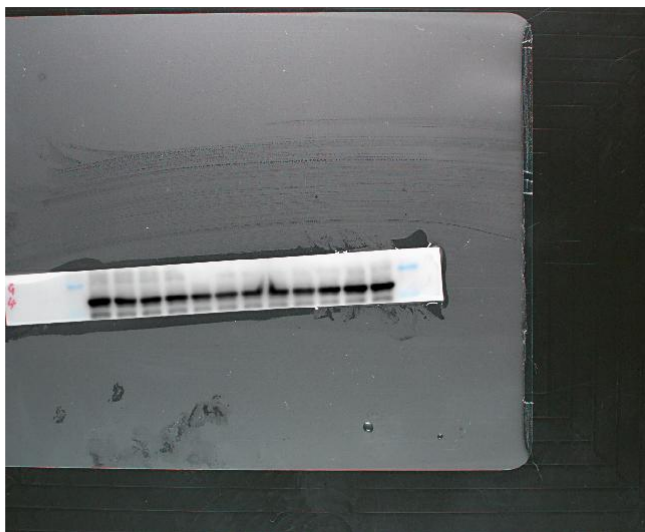

The other exposure image

T N T N T N T N T N T N

GAPDH 36kb

40kb

35kb

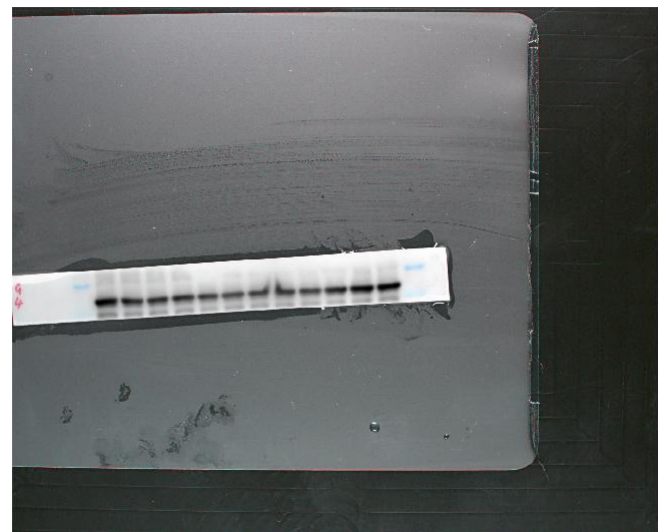

Figure 7E

HuCCT1

RBE

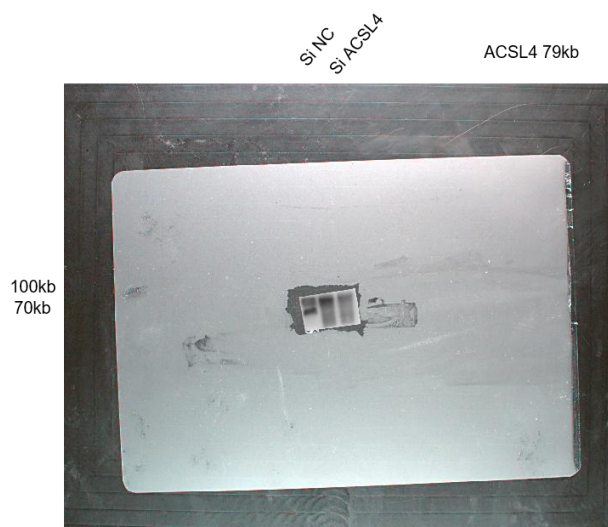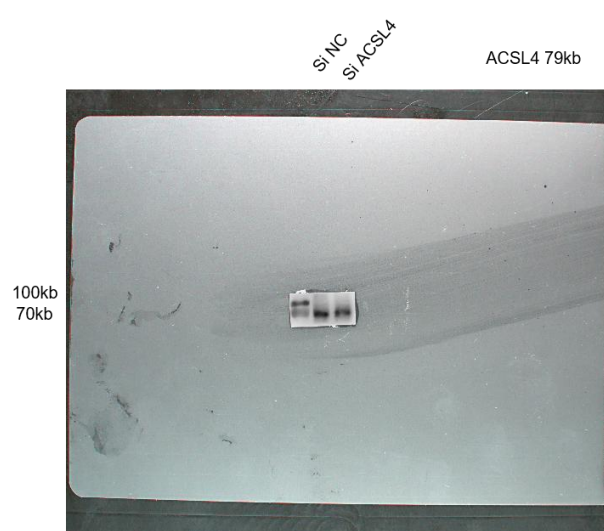

HuCCT1

RBE

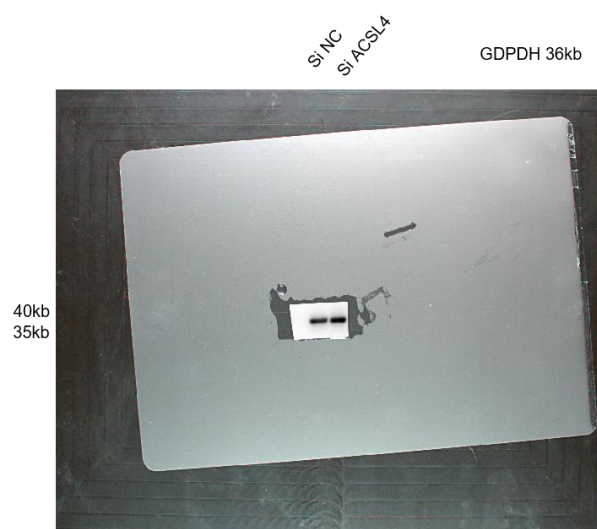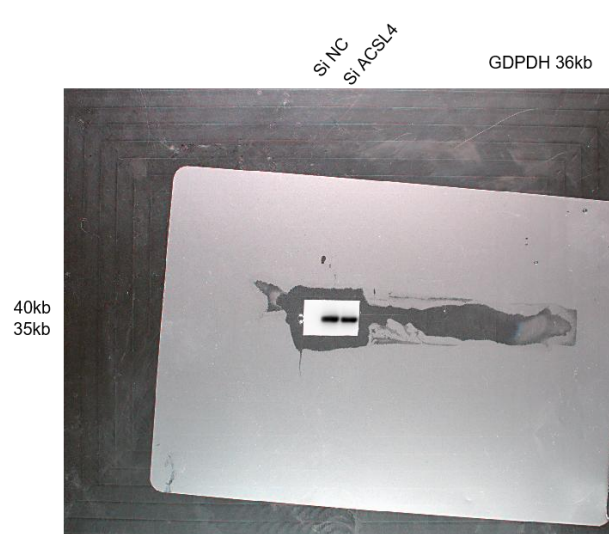

Supplement: MOESM1 [file 12885_2023_10903_MOESM1_ESM.pdf]
